# Supplementary material for: NG-meta-profiler: fast processing of metagenomes using NGLess, a domain-specific language
Source: PubMed Central journal article supplement (PMC6547473; doi:10.1186/s40168-019-0684-8), 2019-06-03
Supplement: 40168_2019_684_MOESM1_ESM.pdf [file 40168_2019_684_MOESM1_ESM.pdf]

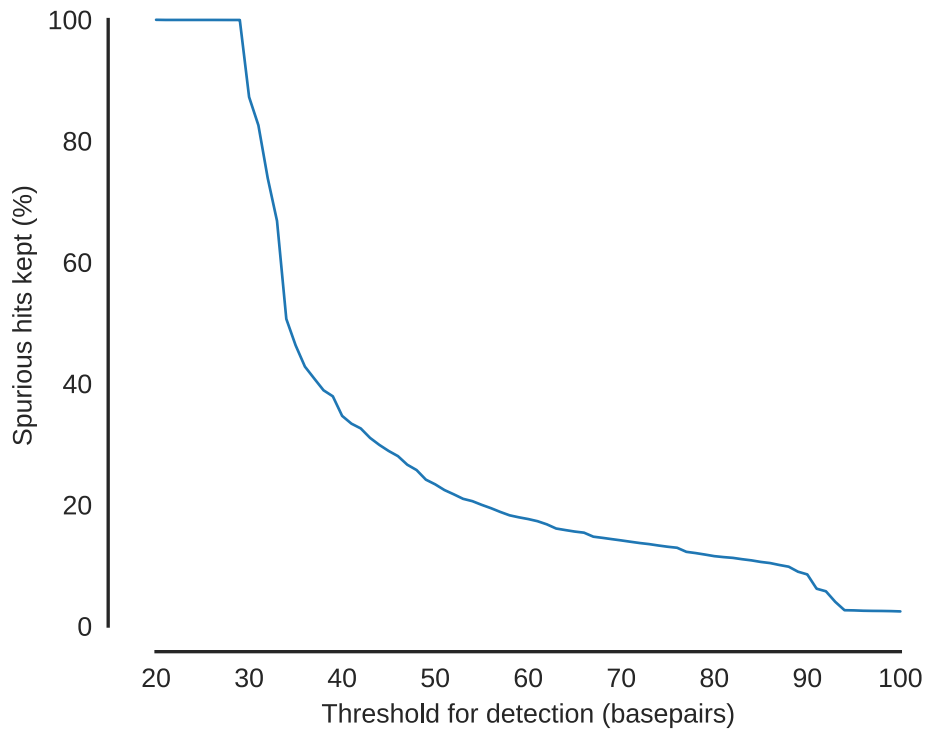

**Supplemental Figure 1:** Fraction of spurious hits to the human genome that is incorrectly kept as a function of the minimum size of the alignment used to consider it a valid alignment. The benchmark simulated dataset was aligned to the human genome. As in this simulated dataset there should be no human reads, any alignment was considered spurious.
