# Supplementary material for: NG-meta-profiler: fast processing of metagenomes using NGLess, a domain-specific language
Source: PubMed Central journal article supplement (PMC6547473; doi:10.1186/s40168-019-0684-8), 2019-06-03
Supplement: 40168_2019_684_MOESM4_ESM.pdf [file 40168_2019_684_MOESM4_ESM.pdf]

# Supplemental File 1: The NGLess Language and Standard Library

Luis Pedro Coelho  
Renato Alves  
Paulo Monteiro  
Jaime Huerta-Cepas  
Ana Teresa Freitas  
Peer Bork  
March 21, 2019

## NGLess Language

This document describes the NGLess language. Please see <http://ngless.embl.de> for an up-to-date version.

## Tokenization

Tokenization follows the standard C-family rules. A word is anything that matches `[A-Za-z_][A-Za-z_0-9]*`. The language is case-sensitive. All files are assumed to be in UTF-8.

Both LF and CRLF are accepted as line endings (Unix-style LF is preferred).

A semicolon (;) can be used as an alternative to a new line. Any spaces (and only space characters) following a semicolon are ignored. *This feature is intended for inline scripts at the command line (passed with the -e option), its use for scripts is heavily discouraged and may trigger an error in the future.*

Script-style (# to EOL), C-style (/\* to \*/) and C++-style (// to EOL) comments are all recognised. Comments are effectively removed prior to any further parsing as are empty lines.

Strings are denoted with single or double quotes and standard backslashed escapes apply (\n for newline, ...).

A symbol is denoted as a token surrounded by curly braces (e.g., {symbol} or {gene}).

Integers are specified as decimals `[0-9]+` or as hexadecimals `0x[0-9a-fA-F]+`.

## Version declaration

The first line (ignoring comments and empty lines) of an NGLess file MUST be a version declaration:

```
ngless "1.0"
```

## Module Import Statements

Following the version statement, optional import statements are allowed, using the syntax `import "<MODULE>" version "<VERSION>"`. For example:

```
import "batch" version "1.0"
```

This statement indicates that the `batch` module, version `1.0` should be used in this script. Module versions are independent of NGLess versions.

Only a predefined set of modules can be imported (these are shipped with NGLess). To import user-written modules, the user **MUST** use the *local import* statement, e.g.:

```
local import "batch" version "1.0"
```

Import statements **MUST** immediately follow the version declaration

## Blocks

Blocks are defined by indentation in multiples of 4 spaces. To avoid confusion, TAB characters are not allowed.

Blocks are used for conditionals and `using` statements.

## Data types

NGLess supports the following basic types:

- String
- Integer
- Double
- Bool
- Symbol
- Filename
- Shortread
- Shortreadset
- Mappedread
- Mappedreadset

In addition, it supports the composite type List of X where X is a basic type. Lists are built with square brackets (e.g., `[1,2,3]`). All elements of a list must have the same data type.

## String

A string can start with either a quote (U+0022, `"`) or a single quote (U+0027, `'`) or and end with the same character. They can contain any number of characters.

Special sequences start with \. Standard backslashed escapes can be used as LF and CR (\n and \r respectively), quotation marks (\') or slash (\\).

## Integer

Integers are specified as decimals [0-9]+ or as hexadecimals 0x[0-9a-fA-F]+. The prefix - denotes a negative number.

## Double

Doubles are specified as decimals [0-9]+ with the decimal point serving as a separator. The prefix - denotes a negative number.

Doubles and Integers are considered numeric types.

## Boolean

The two boolean constants are True and False (which can also be written true or false).

## Symbol

A symbol is denoted as a token surrounded by curly braces (e.g., {symbol} or {drop}). Symbols are used as function arguments to indicate that there is only a limited set of allowed values for that argument. Additionally, unlike Strings, no operations can be performed with Symbols.

## Variables

NGless is a statically typed language and variables are typed. Types are automatically inferred from context.

Assignment is performed with = operator:

```
variable = value
```

A variable that is all uppercase is a constant and can only be assigned to once.

## Operators

### Unary

The operator ( - ) returns the symmetric of its numeric argument.

The operator len returns the length of a ShortRead.

The operator not negates its boolean argument

## Binary

All operators can only be applied to numeric types. Mixing integers and doubles returns a double. The following binary operators are used for arithmetic:

+ - < > >= <= == !=

The + operator can also perform concatenation of String objects.

The </> operator is used to concatenate two Strings while also adding a '/' character between them. This is useful for concatenating file paths.

## Indexing

Can be used to access only one element or a range of elements in a ShortRead. To access one element, is required an identifier followed by an expression between brackets. (e.g, x[10]).

To obtain a range, is required an identifier and two expressions separated by a ':' and between brackets. Example:

- x[ :] - from position 0 until length of variable x
- x[10: ] - from position 10 until length of variable x
- x[:10] - from position 0 until 10

## Conditionals

Conditionals work as in Python. For example:

```
if 5 > 10:
    val = 10
else:
    val = 20
```

## Functions

Functions are called with parentheses:

```
result = f(arg, arg1=2)
```

Functions have a single positional parameter, all other must be given by name:

```
unique(reads, max_copies=2)
```

The exception is constructs which take a block: they take a single positional parameter and a block. The block is passed using the using keyword:

```
reads = preprocess(reads) using |read|:
    block
    ...
```

The `| read |` syntax defines an unnamed (lambda) function, which takes a variable called `read`. The function body is the following block.

There is no possibility of defining new functions within the language. Only built-in functions or those added by modules can be used.

## Methods

Methods are called using the syntax `object . methodName ( <ARGS> )`. As with functions, one argument may be unnamed, all others must be passed by name.

## Grammar

This is the extended Backus-Naur form grammar for the NGLess language (using the [ISO 14977](#) conventions). Briefly, the comma (,) is used for concatenation, [x] denotes *optional*, and {x} denotes *zero or more of x*.

```
string = ? a quoted string, produced by the tokenizer ? ;
word = ? a word produced by the tokenizer ? ;
```

```
eol =
    ';'
    | '\n' {'\n'}
    ;
```

```
ngless = [header], body;
```

```
header = {eol}, ngless_version, {eol}, {import}, {eol}
```

```
ngless_version = "ngless", string, eol ;
```

```
import = ["local"], "import", string, "version", string, eol ;
```

```
body = {expression, eol} ;
```

```
expression =
    conditional
    | "discard"
    | "continue"
    | assignment
    | innerexpression
    ;
```

```
innerexpression = left_expression, binop, innerexpression
                  | left_expression
                  ;
```

```
left_expression = uoperator
```

```

        | method_call
        | indexexpr
        | base_expression
        ;

base_expression = pexpression
        | funccall
        | listexpr
        | constant
        | variable
        ;

pexpression = '(', innerexpression, ')' ;

constant =
    "true"
    | "True"
    | "false"
    | "False"
    | double
    | integer
    | symbol
    ;

double = integer, '.', integer ;
integer = digit, {digit} ;
digit = '0' | '1' | '2' | '3' | '4' | '5' | '6' | '7' | '8' | '9'
;
symbol = '{', word, '}' ;

indentation = ' ', {' '} ;
binop = '+' | '-' | '*' | "!=" | "==" | "</>" | "<=" | "<" | ">="
| ">" | "+" | "-" ;

uoperator =
    lenop
    | unary_minus
    | not_expr
    ;

lenop = "len", '(', expression, ')'
unary_minus = '-', base_expression ;
not_expr = "not", innerexpression ;

funccall = paired
    | word, '(', innerexpression, kwargs, ')', [ funcblock ]
    ;

```

```

(* paired is a special-case function with two arguments *)
paired = "paired", '(', innerexpression, ',', innerexpression,
kwargs ;

funcblock = "using", '|', [ variablelist ], '|', ':', block ;

kwargs = {',', variable, '=', innerexpression} ;

assignment = variable, '=', expression ;

method_call = base_expression, '.', word, '(', [ method_args ],
')';
method_args =
    innerexpression, kwargs
    | variable, '=', innerexpression, kwargs
    ; (* note that kwargs is defined as starting with a comma
*)

indexexpr = base_expression, '[', [ indexing ], ']' ;

indexing = [ innerexpression ], ':', [ innerexpression ] ;

listexpr = '[', [ list_contents ], ']' ;
list_contents = innerexpression, {',', innerexpression } ;

conditional = "if", innerexpression, ':', block,
[ elseblock ] ;
elseblock = "else", ':', block ;
block = eol, indentation, expression, eol, {indentation,
expression, eol} ;

variablelist = variable, {',', variable} ;
variable = word ;

```

## NGLess Builtin Functions

### fastq

Function to load a FastQ file:

```
in = fastq('input.fq')
```

#### Argument:

String

## Return:

ReadSet

## Arguments by value:

| Name     | Type                                            | Required | Default Value |
|----------|-------------------------------------------------|----------|---------------|
| encoding | Symbol ({auto}, {33}, {64}, {sanger}, {solexa}) | no       | {auto}        |

Possible values for encoding are:

- {sanger} or {33} assumes that the file is encoded using sanger format. This is appropriate for newer Illumina outputs.
- {solexa} or {64} assumes that the file is encoded with a 64 offset. This is used for older Illumina/Solexa machines.
- {auto}: use auto detection. This is the default.

When loading a data set, quality control is carried out and statistics can be visualised in a graphical user interface (GUI). Statistics calculated are:

- percentage of guanine and cytosine (%GC)
- number of sequences
- minimum/maximum sequence length
- mean, median, lower quartile and upper quality quartile for each sequence position

If not specified, the encoding is guessed from the file.

Gzip and bzip2 compressed files are transparently supported (determined by file extension, .gz and .bz2 for gzip and bzip2 respectively).

## paired

Function to load a paired-end sample, from two FastQ files:

```
in = paired('input.1.fq', 'input.2.fq', singles='input.3.fq')
```

paired() is an exceptional function which takes **two** unnamed arguments, specifying the two read files (first mate and second mate) and an optional singles file (which contains unpaired reads).

## Argument:

String, String

## Return:

ReadSet



### Arguments by value:

| Name     | Type                                            | Required | Default Value |
|----------|-------------------------------------------------|----------|---------------|
| encoding | Symbol ({auto}, {33}, {64}, {sanger}, {solexa}) | no       | {auto}        |
| singles  | String                                          | no       |               |

The encoding argument has the same meaning as for the `fastq()` function:

- {sanger} or {33} assumes that the file is encoded using sanger format. This is appropriate for newer Illumina outputs.
- {solexa} or {64} assumes that the file is encoded with a 64 offset. This is used for older Illumina/Solexa machines.
- {auto}: use auto detection. This is the default.

### samfile

Loads a SAM file:

```
s = samfile('input.sam')
```

This function takes no keyword arguments. BAM files are also supported (determined by the filename), as are `sam.gz` files.

### Returns

MappedReadSet

### Arguments by value:

| Name   | Type   | Required | Default Value |
|--------|--------|----------|---------------|
| name   | String | no       |               |
| header | String | no       |               |

**Note:** The header argument was added in version 0.7

- The name argument names the group (for `count()`, for example).
- The headers argument can be used if the SAM headers are kept in a separate file.

### qcstats

**Note:** This functionality was not available prior to 0.6

Returns the auto-computed statistics:

```
write(qcstats({fastq}), ofile='fqstats.txt')
```

## Returns

CountsTable

## Argument

{fastq}: FastQ statistics {mapping}: Mapping statistics

## countfile

Loads a TSV file:

```
c = countfile('table.tsv')
```

This function takes no keyword arguments. If the filename ends with ".gz", it is assumed to be a gzipped file.

## Returns

CountTable

## as\_reads

Converts from a MappedReadSet to a ReadSet:

```
reads = as_reads(samfile('input.sam'))
```

## unique

Function that given a set of reads, returns another which only retains a set number of copies of each read (if there are any duplicates). An example:

```
input = unique(input, max_copies=3)
```

## Argument:

ReadSet

## Return:

ReadSet

## Arguments by value:

| Name       | Type    | Required | Default Value |
|------------|---------|----------|---------------|
| max_copies | Integer | no       | 2             |

The optional argument **max\_copies** allows to define the number of tolerated copies (default: 2).

Two short reads with the same nucleotide sequence are considered copies, independently of quality and identifiers.

This function is currently limited to single-end samples.

## preprocess

This function executes the given block for each read in the ReadSet. Unless the read is **discarded**, it is transferred (after transformations) to the output. For example:

```
inputs = preprocess(inputs) using |read|:  
  read = read[3:]
```

### Argument:

ReadSet

### Return:

ReadSet

### Arguments by value:

| Name         | Type | Required | Default Value |
|--------------|------|----------|---------------|
| keep_singles | bool | no       | true          |

When a paired-end input is being preprocessed in single-mode (i.e., each mate is preprocessed independently, it can happen that on eof the mates is discarded, while the other is kept). The default is to collect these into the singles pile. If `keep_singles` is false, however, they are discarded.

This function also performs quality control on its output.

## map

The function `map`, maps a ReadSet to reference. For example:

```
mapped = map(input, reference='sacCer3')  
mapped = map(input, ffile='ref.fa')
```

### Argument:

ReadSet

### Return:

MappedReadSet

### Arguments by value:

| Name | Type | Required | Default Value |
|------|------|----------|---------------|
|------|------|----------|---------------|

|                      |         |    |
|----------------------|---------|----|
| reference            | String  | no |
| fafile               | String  | no |
| block_size_megabases | Integer | no |
| mode_all             | Bool    | no |

The user must provide either a path to a FASTA file in the `fafile` argument or the name of a builtin reference using the `reference` argument. The `fafile` argument supports [search path expansion](#).

A list of datasets provided by NGLess can be found at [Organisms](#).

To use any of these, pass in the name as the reference value:

```
mapped_hg19 = map(input, reference='hg19')
```

NGLess does not ship with any of these datasets, but they are downloaded lazily: i.e., the first time you use them, NGLess will download and cache them. NGLess will also index any database used the first time it is used.

The option `block_size_megabases` turns on low memory mode (see the corresponding section in the [mapping documentation](#))

The option `mode_all=True` can be passed to include all alignments of both single and paired-end reads in the output SAM/BAM.

## mapstats

Computes some basic statistics from a set of mapped reads (number of reads, number mapped, number uniquely mapped).

### Argument

MappedReadSet

### Return

CountTable

### select

`select` filters a MappedReadSet. For example:

```
mapped = select(mapped, keep_if=[{mapped}])
```

### Argument:

MappedReadSet

## Return:

MappedReadSet

## Arguments by value:

| Name    | Type     | Required | Default Value |
|---------|----------|----------|---------------|
| keep_if | [Symbol] | no       |               |
| drop_if | [Symbol] | no       |               |
| paired  | Bool     | no       | true          |

At least one of `keep_if` or `drop_if` should be passed, but not both. They accept the following symbols:

- `{mapped}`: the read mapped
- `{unmapped}`: the read did not map
- `{unique}`: the read mapped to a unique location

If `keep_if` is used, then reads are kept if they pass **all the conditions**. If `drop_if` they are discarded if they fail to **any condition**.

By default, `select` operates on a paired-end read as a whole. If `paired=False` is passed, however, then link between the two mates is not considered and each read is processed independently.

## count

Given a file with aligned sequencing reads (`ReadSet`), `count()` will produce a counts table depending on the arguments passed. For example:

```
counts = count(mapped, min=2, mode={union}, multiple={dist1})
```

## Argument:

MappedReadSet

## Return:

CountTable

## Arguments by value:

| Name                        | Type       | Required | Default value |
|-----------------------------|------------|----------|---------------|
| <code>gff_file</code>       | String     | no*      |               |
| <code>functional_map</code> | String     | no*      |               |
| <code>features</code>       | [ String ] | no       | 'gene'        |

|                |            |    |         |
|----------------|------------|----|---------|
| subfeatures    | [ String ] | no |         |
| mode           | Symbol     | no | {union} |
| multiple       | Symbol     | no | {dist1} |
| strand         | Bool       | no | false   |
| normalization  | Symbol     | no | {raw}   |
| include_minus1 | Bool       | no | true    |
| min            | Integer    | no | 0       |
| discard_zeros  | Bool       | no | false   |
| reference      | String     | no | ""      |

If the features to count are [ 'seqname' ], then each read will be assigned to the name of reference it matched and only an input set of mapped reads is necessary. For other features, you will need extra information. This can be passed using the `gff_file` or `functional_map` arguments. If you had previously used a reference argument for the `map()` function, then you can also leave this argument empty and NGLess will use the corresponding annotation file.

The `gff_file` and `functional_map` arguments support [search path expansion](#).

`features`: which features to count. If a GFF file is used, this refers to the "features" field.

`subfeatures`: this is useful in GFF-mode as the same feature can encode multiple attributes (or, in NGLess parlance, "subfeatures"). By default, NGLess will look for the "ID" or "gene\_id" attributes.

`mode` indicates how to handle reads that (partially) overlap one or more features. Possible values for `mode` are {union}, {intersection\_non\_empty} and {intersection\_strict} (default: {union}). For every position of a mapped read, collect all features into a set. These sets of features are then handled in different modes.

- {union} the union of all the sets. A read is counted for every feature it overlaps.
- {intersection\_non\_empty} the intersection of all non-empty sets. A read is only counted for features it exclusively overlaps, even if partially.
- {intersection\_strict} the intersection of all the sets. A read is only counted if the entire read overlaps the same feature(s).

Consider the following illustration of the effect of different mode options:

```

Reference *****
Feature A      =====
Feature B      =====
Feature C      =====
Read_1         -----
Read_2         -----
Read_3         -----
Position       12345 12345 12345

```

```

Read position      1    2    3    4    5
Read_1 feature sets -    -    A    A    A
Read_2 feature sets  A    A   A,B   B    B
Read_3 feature sets B,C  B,C  B,C   B,C  B,C

```

```

                union  intersection_non_empty  intersection_strict
Read_1          A                                -
Read_2         A & B                                -
Read_3         B & C                                B & C

```

How to handle multiple mappers (inserts which have more than one "hit" in the reference) is defined by the `multiple` argument:

- `{unique_only}`: only use uniquely mapped inserts
- `{all}`: count all hits separately. An insert mapping to 4 locations adds 1 to each location
- `{lowerN}`: fractionally distribute multiple mappers. An insert mapping to 4 locations adds 0.25 to each location
- `{dist}`: distribute multiple reads based on uniquely mapped reads. An insert mapping to 4 locations adds to these in proportion to how uniquely mapped inserts are distributed among these 4 locations.

Argument `strand` represents whether the data are from a strand-specific (default is `false`). When the data is not strand-specific, a read is always overlapping with a feature independently of whether maps to the same or the opposite strand. For strand-specific data, the read has to be mapped to the same strand as the feature.

`min` defines the minimum amount of overlaps a given feature must have, at least, to be kept (default: 0, i.e., keep all counts). If you just want to discard features that are exactly zero, you should set the `discard_zeros` argument to `True`.

`normalization` specifies if and how to normalize to take into account feature size:

- `{raw}` (default) is no normalization
- `{normed}` is the result of the `{raw}` mode divided by the size of the feature
- `{scaled}` is the result of the `{normed}` mode scaled up so that the total number of counts is identical to the `{raw}` (within rounding error)

Unmapped inserts are included in the output if `{include_minus1}` is true (default: `False`).

**Note:** Before version 0.6, the default was to **not** include the -1 fraction.

## subtrim

Given a read finds the longest substring, such that all bases are of at least the given quality. The name is a construction of "substring trim". For example:

```
read = subtrim(read, min_quality=25)
```

### Argument:

ShortRead

### Return:

ShortRead

### Arguments

| Name        | Type    | Required | Default Value |
|-------------|---------|----------|---------------|
| min_quality | Integer | yes      |               |

min\_quality parameter defines the minimum quality accepted for the subsequence.

## endstrim

Given a read, trim from both ends (5' and 3') all bases below a minimal quality. For example:

```
read = endstrim(read, min_quality=25)
```

### Argument:

ShortRead

### Return:

ShortRead

### Arguments

| Name        | Type    | Required | Default Value |
|-------------|---------|----------|---------------|
| min_quality | Integer | yes      |               |

min\_quality parameter defines the minimum quality value.



## smoothtrim

This trims with the same algorithm as `subtrim` but uses a sliding window to average base qualities. For example:

```
read = smoothtrim(read, min_quality=15, window=4)
```

Quality values of bases at the edges of each read are repeated to allow averaging with quality centered on each base. For instance a read:

```
Sequence  A  T  C  G    with a window    A  A  T  C  G  G
Quality   28 25 14 12  of size 3 becomes 28 28 25 14 12 12
```

and is smoothed:

```
Seq      A  A  T  C  G  G    smoothed quality    A  T  C  G
Qual     28 28 25 14 12 12    ---->          27 22 17 13
Windows  |-----|          (28 + 28 + 25) / 3 = 27    ^
...      |-----|          (28 + 25 + 14) / 3 = 22    |
          |-----|          (25 + 14 + 12) / 3 = 17    !
          |-----|          (14 + 12 + 12) / 3 = 13  ----+
```

at which point `subtrim` is applied for trimming.

Quality scores are returned to their original value after trimming.

## Argument

ShortRead

## Return

ShortRead

## Arguments

| Name                     | Type    | Required | Default Value |
|--------------------------|---------|----------|---------------|
| <code>min_quality</code> | Integer | yes      |               |
| <code>window</code>      | Integer | yes      |               |

`min_quality` parameter defines the minimum quality value, whilst `window` defines the size of the window over which to smooth the qualities.

## write

Writes an object to disk.

## ReadSet

### Argument:

Any

### Return:

Void

### Arguments by value:

| Name   | Type   | Required | Default Value |
|--------|--------|----------|---------------|
| ofile  | String | yes      |               |
| format | String | no       |               |

The argument of `ofile` is where to write the content.

The output format is typically determined from the `ofile` extension, but the `format` argument overrides this. Supported formats:

- CountsTable: {tsv} (default) or {csv}: use TAB or COMMA as a delimiter
- MappedReadSet: {sam} (default) or {bam}
- ReadSet: FastQ format, optionally compressed (depending on the extension).

## print

Print function allows to print a `NGLessObject` to IO.

### Argument:

`NGLessObject`

### Return:

Void

### Arguments by value:

none

## readlines

Reads a text file and returns a list with all the strings in the file

### Argument

string: the filename

## Example

`readlines` is useful in combination with the [parallel](#) module, where you can then use the `lock1` function to process a large set of inputs:

```
sample = lock1(readlines('samplelist.txt'))
```

## assemble

`assemble`

## Implementation

`assemble()` uses the [MEGAHIT](#) assembler.

## Arguments

`ReadSet`

## Returns

`string` : generated file

## orf\_find

`orf_find` finds open reading frames (ORFs) in a sequence set:

```
contigs = assemble(input)
orfs = select(contigs, is_metagenome=True)
```

## Argument:

`SequenceSet`

## Return:

`SequenceSet`

## Arguments by value:

| Name                       | Type                  | Required | Default Value |
|----------------------------|-----------------------|----------|---------------|
| <code>is_metagenome</code> | <code>Bool</code>     | yes      |               |
| <code>coords_out</code>    | <code>FilePath</code> | no       |               |
| <code>protos_out</code>    | <code>FilePath</code> | no       |               |

## Implementation

`NGLess` uses [Prodigal](#) as the underlying gene finder.

## Methods

Methods are invoked using an object-oriented syntax. For example:

```
mapped = select(mapped) using |mr|:  
    mr = mr.pe_filter()
```

They can also take arguments

```
mapped = select(mapped) using |mr|:  
    mr = mr.filter(min_match_size=30)
```

## Short reads

Short reads have the following methods:

- `avg_quality()`: the average quality (as a double)
- `fraction_at_least(q)`: the fraction of bases of quality greater or equal to `q`
- `n_to_zero_quality()`: transform the quality scores so that any N (or n) bases in the sequence get a quality of zero.

## Mapped reads

Mapped reads contain several methods. *None of these methods changes its argument, they return new values.* The typical approach is to reassign the result to the same variable as before (see examples above).

- `pe_filter`: only matches where both mates match are kept.
- `flag`: Takes one of {mapped} or {unmapped} and returns true if the reads were mapped (in a paired-end setting, a read is considered mapped if at least one of the mates mapped).
- `some_match`: Takes a reference name and returns True if the read mapped to that reference name.
- `allbest`: eliminates matches that are not as good as the best. For NGLess, the number of errors (given by the NM field) divided by the length of the longest match is the fractional distance of a match. Thus, a match with 3 errors over 100 bp is considered better than a match with 0 errors over 90bps.

## filter

`filter` takes a mapped read and returns a mapped read according to several criteria:

- `min_match_size`: minimum match size
- `min_identity_pc`: minimum percent identity (considered over the matching location, trimming on the left and right are excluded).
- `max_trim`: maximum number of bases trimmed off the ends. Use 0 to specify only global matches.

If more than one test is specified, then they are combined with the AND operation (i.e., all conditions have to be fulfilled for the test to be true).

The default is to discard mappings that do not pass the test, but it can be changed with the `action` argument, which must be one of `{drop}` (default: the read is excluded from the output), or `{unmatch}` (the read is changed so that it no longer reports matching).

You can pass the flag `reverse` (i.e., `reverse=True`) to reverse the sign of the test.

## NGLess Constants

In NGLess, any variable written in uppercase is a constant, i.e., can only be assigned to once. In addition, there are builtin constants defined by NGLess.

### Built in constants

- `ARGV`

This is string array which contains the arguments passed to the script

- `STDIN`

Use in place of a filename to read from standard input

- `STDOUT`

Use in place of a filename to write to standard output

For example:

```
ngless '1.0'
```

```
input = samfile(STDIN)
input = select(input) using |mr|:
  if mr.flag({mapped}):
    discard
write(input, ofile=STDOUT, format={bam})
```

This file reads a sam stream from `stdin`, filters it (using the `select` call) and writes to standard output in `bam` format.

## Standard library

### Parallel module

This module allows you to run several parallel computations. It provides two functions: `lock1` and `collect`.

`lock1 :: [string] -> string` takes a list of strings and returns a single element. It uses the filesystem to obtain a lock file so that if multiple processes are running at once, each one will return a different element. `NGLess` also marks results as *finished* once you have run a script to completion.

The intended usage is that you simply run as many processes as inputs that you have and `NGLess` will figure everything out.

For example

```
ngless "0.6"
import "parallel" version "0.6"

samples = ['Sample1', 'Sample2', 'Sample3']
current = lock1(samples)
```

Now, `current` will be one of `'Sample1'`, `'Sample2'`, or `'Sample3'`. You can use this to find your input data:

```
input = paired("data/" + current + ".1.fq.gz", "data/" + current
+ ".2.fq.gz")
```

Often, it's a good idea to combine `lock1` with `readlines` (a function which returns the contents of all the non-empty lines in a file as a list of strings):

```
samples = readlines('samples.txt')
current = lock1(samples)
input = paired("data/" + current + ".1.fq.gz", "data/" + current
+ ".2.fq.gz")
```

You now use `input` as in any other `NGLess` script:

```
mapped = map(input, reference='hg19')
write(input, ofile='outputs/'+current+ '.bam')
counts = count(mapped)
write(counts, ofile='outputs/'+current+ '.txt')
```

This will result in both BAM files and counts being written to the `outputs/` directory. The module also adds the `collect` function which can paste all the counts together into a single table, for convenience:

```
collect(
  counts,
  current=current,
  allneeded=samples,
  ofile='outputs/counts.txt.gz')
```

Now, only when all the samples in the `allneeded` argument have been processed, does `NGLess` collect all the results into a single table.

### Full "parallel" example

```
ngless "0.8"
import "parallel" version "0.6"

sample = lock1(readlines('input.txt'))
input = fastq(sample)
mapped = map(input, reference='hg19')
collect(count(mapped, features=['seqname']),
        current=sample,
        allneeded=readlines('input.txt'),
        ofile='output.tsv')
```

Now, you can run multiple ngless jobs in parallel and each will work on a different line of `input.txt`.

### Parallel internals

Normally this should be invisible to you, but if you are curious or want to debug an issue, here are the gory details:

The function `lock1()` will create a lock file in a sub-directory of `ngless - locks`. This directory will be named by the hash value of the script. Thus, any change to the script will force all data to be recomputed. This can lead to over-computation but it ensures that you will always have the most up to date results (NGLess' first priority is correctness, performance is important, but not at the risk of correctness). Similarly, `collect()` will use hashed values which encode both the script and the position within the script (so that if you have more than one `collect()` call, they will not clash).

Lock files have their modification times updated once every 10 minutes while NGLess is running. This allows the programme to easily identify stale files. The software is very conservative, but any lock file with a modification time older than one hour is considered stale and removed. Note that because NGLess will write always create its outputs atomically, the worse that can happen from mis-identifying a stale lock (for example, you had a compute node which lost network connectivity, but it comes back online after an hour and resumes processing) is that extra computation is wasted, **the processes will never interfere in a way that you get erroneous results**.

### Samtools module

This module exposes the samtools sorting functionality through the `samtools_sort` function.

```
ngless '0.0'
import "samtools" version "0.0"
to_sort = samfile('input.bam')
sorted = samtools_sort(to_sort)
write(sorted, ofile='input.sorted.bam')
```

`samtools_sort :: mappedreadset -> mappedreadset` returns a sorted version of the dataset.

Internally, this function calls NGLess' version of samtools while respecting your settings for the use of threads and temporary disk space. When combined with other functionality, NGLess can also often stream data into/from samtools instead of relying on intermediate files (these optimizations should not change the visible behaviour, only make the computation faster).

## Mocat module

```
import "mocat" version "0.6"
```

This is a [MOCAT](#) compatibility layer to make it easier to adapt projects from MOCAT to NGLess.

## Functions

`load_mocat_sample :: string -> readset` this function takes a directory name and returns a set of reads by scanning the directory for (compressed) FastQ files. This is slightly more flexible than MOCAT2 as it also accepts files with the extension `fastq` or `fastq.gz` as well as `_1` and `_2` to indicate the two mate files.

`coord_file_to_gtf :: string -> string` this function takes a MOCAT-style `.coord`, converts it internally to a GTF file and returns it.

Example usage:

```
ngless "0.6"
import "mocat" version "0.6"

sample = load_mocat_sample('Sample1')
mapped = map(sampled, ffile='data/catalog.padded.fna')
write(count(mapped,
  gff_file=coord_file_to_gtf('data/catalog.padded.coord')),
  ofile='counts.txt')
```

This module can be combined with the `parallel` module (see above) to obtain a very smooth upgrade from MOCAT to NGLess.

## Available Reference Genomes

NGLess provides builtin support for the most widely used model organisms (human, mouse, yeast, *C. elegans*, ...; see the full table below). This makes it easier to use the tool when using these organisms as some knowledge is already built in.



## Genome references available

NGLess provides archives containing data sets of organisms. It also provides gene annotations that provide information about protein-coding and non-coding genes, splice variants, cDNA and protein sequences, non-coding RNAs.

The following table lists the genomes provided by default:

| Name     | Description              | Assembly          | Ensembl |
|----------|--------------------------|-------------------|---------|
| bosTau4  | bos_taurus               | UMD3.1            | 75      |
| ce10     | caenorhabditis_elegans   | WBcel235          | 75      |
| canFam3  | canis_familiaris         | CanFam3.1         | 75      |
| dm6      | drosophila_melanogaster  | BDGP6             | 90      |
| dm5      | drosophila_melanogaster  | BDGP5             | 75      |
| gg5      | gallus_gallus            | Gallus_gallus-5.0 | 90      |
| gg4      | gallus_gallus            | GalGal4           | 75      |
| hg38.p10 | homo_sapiens             | GRCh38.p10        | 90      |
| hg38.p7  | homo_sapiens             | GRCh38.p7         | 85      |
| hg19     | homo_sapiens             | GRCh37            | 75      |
| mm10.p5  | mus_musculus             | GRCm38.p5         | 90      |
| mm10.p2  | mus_musculus             | GRCm38.p2         | 75      |
| rn6      | rattus_norvegicus        | Rnor_6.0          | 90      |
| rn5      | rattus_norvegicus        | Rnor_5.0          | 75      |
| sacCer3  | saccharomyces_cerevisiae | R64-1-1           | 75      |
| susScr11 | sus_scrofa               | Sscrofa11.1       | 90      |

These archives are all created using versions 75, 85 and 90 of Ensembl.
